# Supplementary material for: Observation and modeling of a historic African dust intrusion into theCaribbean Basin and the southern U.S. in June 2020
Source: Copernicus journal article supplement (doi:10.5194/acp-2021-73), 2021-03-03
Supplement: Supplementary file 1 [file acp-2021-73-supplement.pdf]

## Supplementary Online Materials

### Observation and modeling of a gigantic African dust intrusion into the Caribbean Basin and the southern U.S. in June 2020

**Figure S1:** Curtain plots of CALIOP aerosol extinction coefficient in the Caribbean Basin on June 22, 23, and 24, 2020.

**Figure S2:** MODIS/Terra daily AOD for 2020 (red dot and thick line) in comparison to 2000-2019 climatology (the median and range of daily AOD are represented by thick black line and gray vertical bar, respectively) in West Africa (10N-30N, 17W-10E), a sub-set of the SAHD defined in Figure 9. The insets zoom in to the day-to-day variations of regional AOD from June 10 to June 30, 2020.

**Figure S3:** GEOS daily AOD for 2020 (red dot and thick line) in comparison to 2000-2019 climatology (the median and range of daily AOD are represented by thick black line and gray vertical bar, respectively) in seven regions defined in (a). The insets in (b-h) zoom in to the day-to-day variations of regional AOD from June 10 to June 30, 2020.

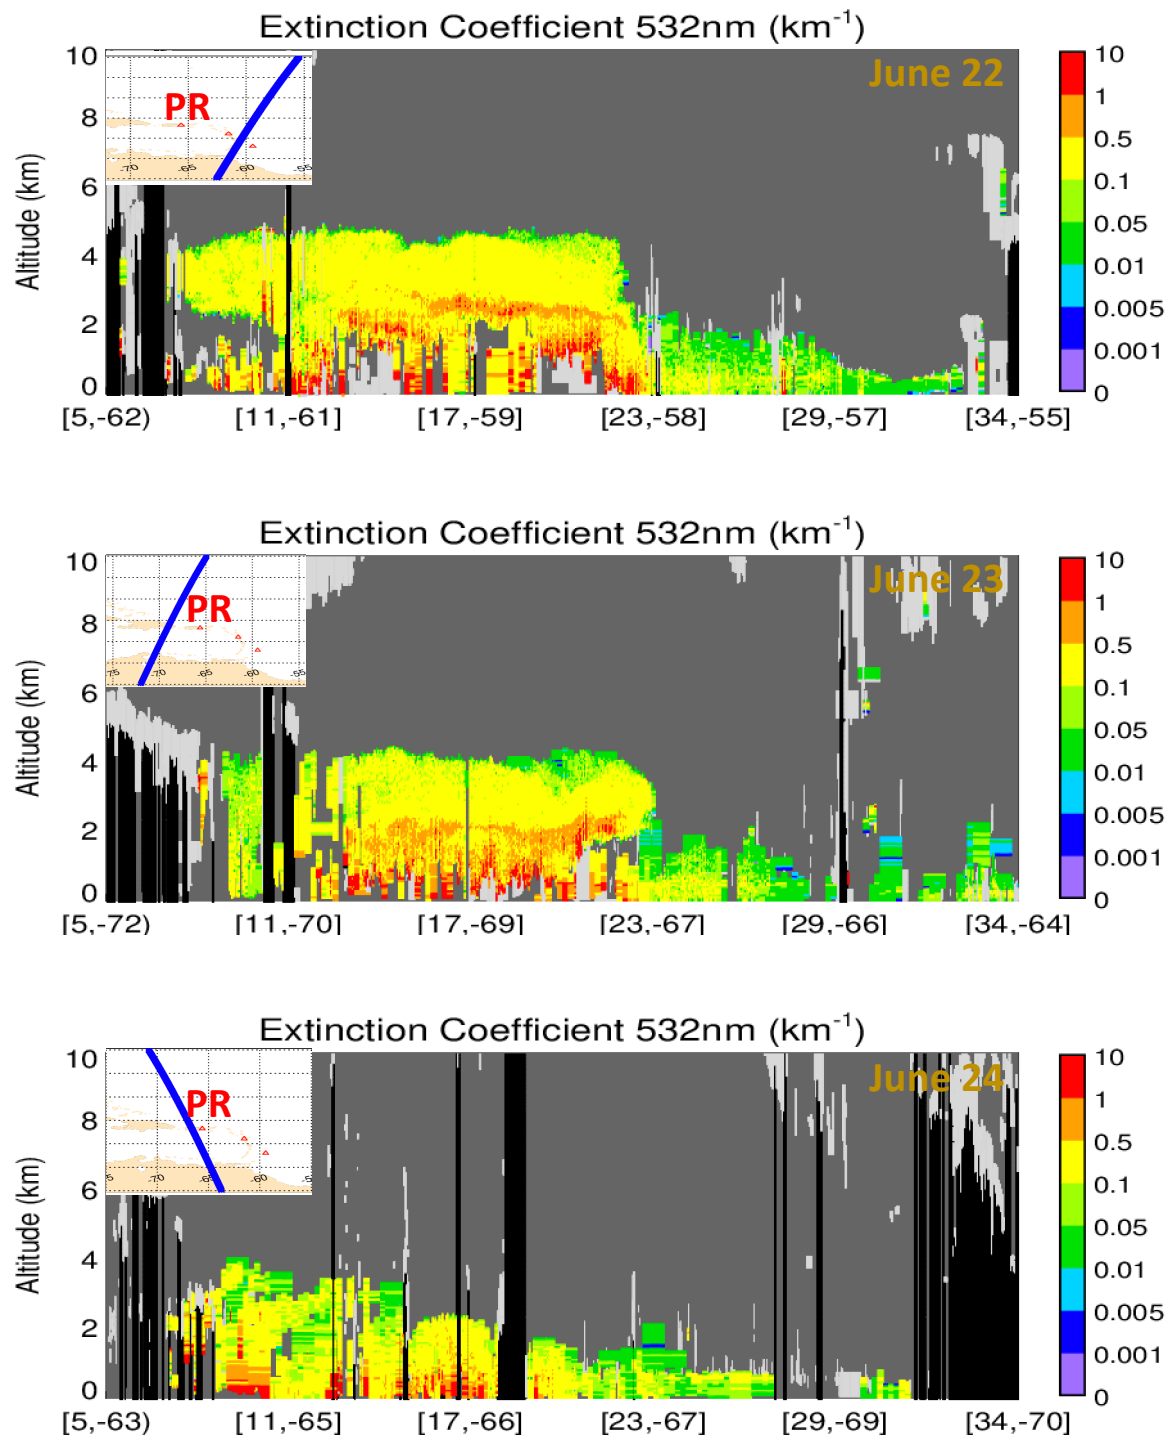

**Figure S1:** Curtain plots of CALIOP aerosol extinction coefficient in the Caribbean Basin on June 22, 23, and 24, 2020.

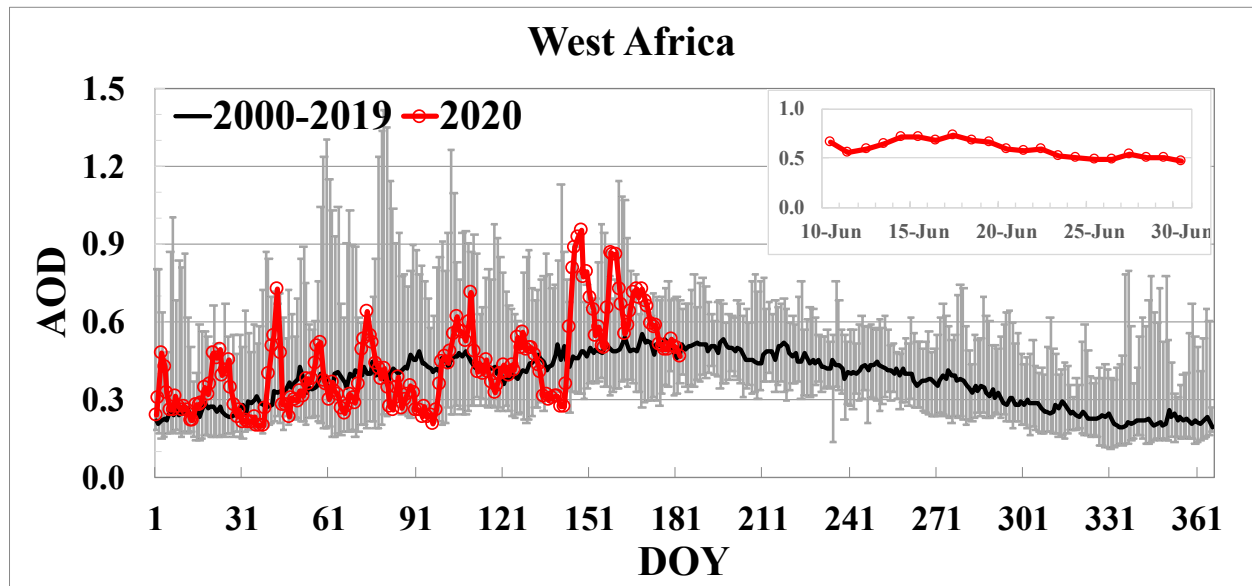

**Figure S2:** MODIS/Terra daily AOD for 2020 (red dot and thick line) in comparison to 2000-2019 climatology (the median and range of daily AOD are represented by thick black line and gray vertical bar, respectively) in West Africa (10°N-30°N, 17°W-10°E), a sub-set of the SAHD defined in Figure 9. The insets zoom in to the day-to-day variations of regional AOD from June 10 to June 30, 2020.

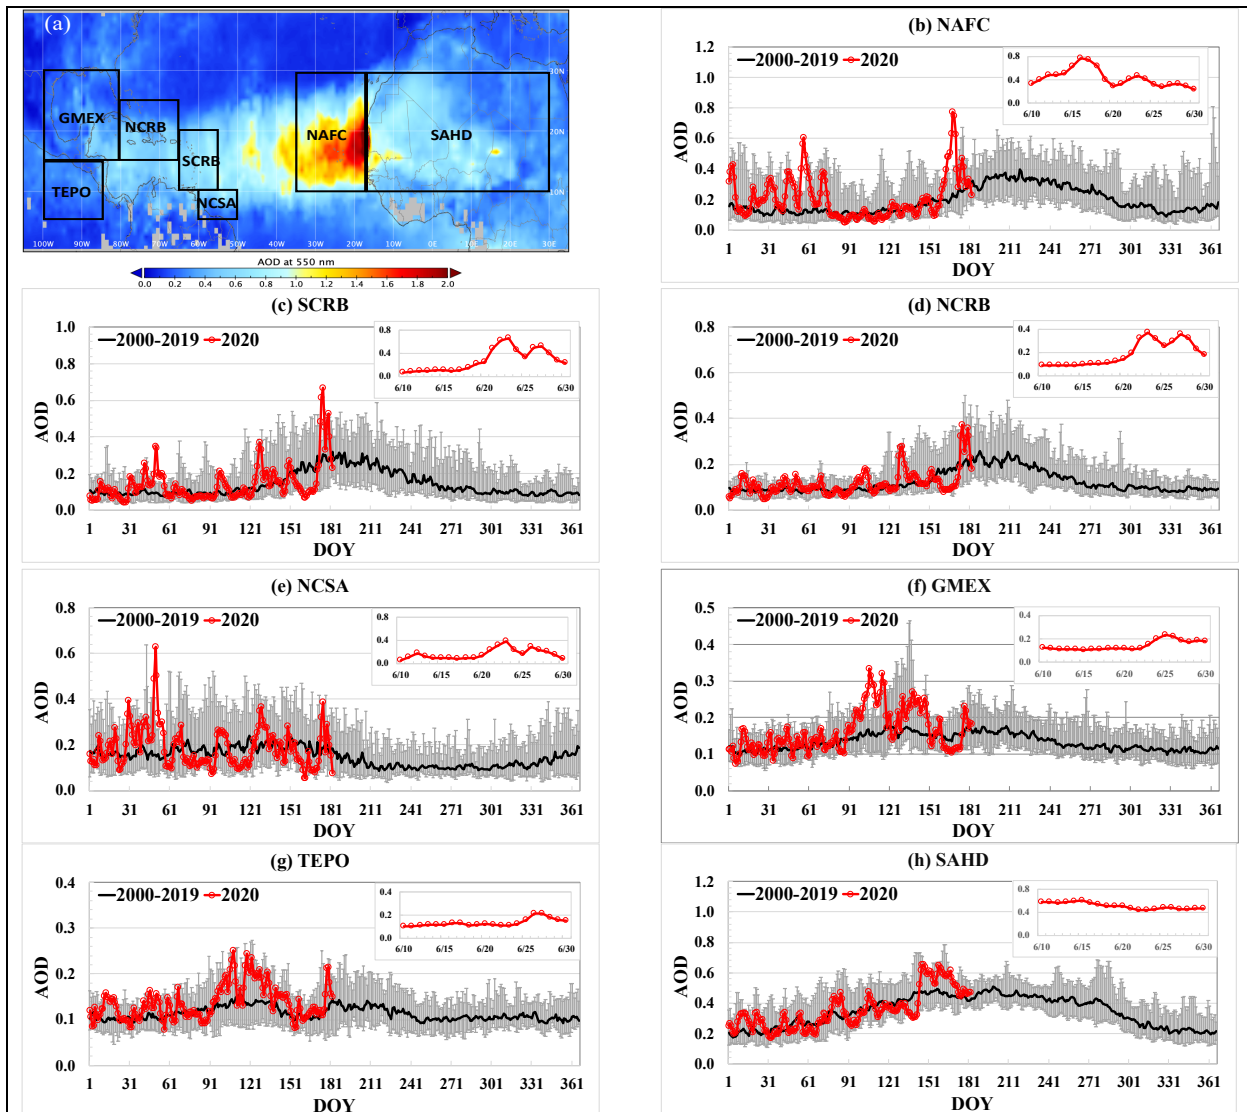

**Figure S3:** GEOS daily AOD for 2020 (red dot and thick line) in comparison to 2000-2019 climatology (the median and range of daily AOD are represented by thick black line and gray vertical bar, respectively) in seven regions defined in (a). The insets in (b-h) zoom in to the day-to-day variations of regional AOD from June 10 to June 30, 2020.
